# Supplementary material
Source: PubMed Central journal article supplement (PMC9725012)
Supplement: EIJ-D-20-01046_Combaret_SD.pdf [file EIJ-D-20-01046_Combaret_SD.pdf]

## Supplementary data

### Supplementary Appendix 1. List of all investigators of the DISCO registry

Edouard Gerbaud (CHU Bordeaux)  
François Derimay (Hôpital Louis Pradel CHU Lyon)  
Brahim Harbaoui (Hôpital Croix Rousse CHU Lyon)  
Didier Bresson (GHR Mulhouse Sud Alsace)  
Nicolas Meneveau (CHU Besançon)  
Lionel Mangin (CH Annecy-Genevois)  
Grégoire Rangé (CH Chartres)  
Benoit Lattuca (CHU Nîmes)  
Thibault Lhermusier (CHU Toulouse)  
Pierre Barnay (CH Avignon)  
Stéphane Manzo-Silberman (Hôpital Lariboisière AP-HP)  
Emmanuel Boiffard (CHD Vendée)  
Emmanuelle Filippi (CH Bretagne Atlantique)  
Vincent Roule (CHU Caen)  
Jean Louis Georges (CH Versailles)  
Arnaud Fluttaz (CH Métropole Savoie)  
Stéphanie Marlière (CHU Grenoble)  
Grégory Ducroq (Hôpital Bichat AP-HP)  
Hakim Benamer (Hôpital La Roseiraie, Hôpital Jacques Cartier)  
Louis Le Bivic (CHU Limoges)  
Yann Valy (CH La Rochelle)  
Emmanuel Salengro (Hôpital Villeneuve Saint Georges)  
René Koning (Clinique Saint Hilaire Rouen)  
Arsène Monnier (Polyclinique Courlancy)  
Gaetan Karillon (Hôpital Eaubonne)  
Norbert Mayaud (Clinique Convert Bourg En Bresse)  
Antoine Gerbay (CHU Saint-Etienne)  
David Houpe (CH Valenciennes)  
Fabien De Poli (CH Haguenau)  
Olivier Dubreuil (CH Saint Joseph Saint Luc)  
Christophe Saint-Etienne (CHU Tours)  
Christophe Caussin (Institut Mutualiste Montsouris)  
Johanne Silvain (Hôpital Pitié Salpêtrière AP-HP)  
Amer Zabalawi (CH Saint-Brieuc)  
Christian Spaulding and Etienne Puymirat (HEGP AP-HP)  
Laurent Bali (CH Cannes)  
Philippe Brunel (Clinique Fontaine-Lès-Dijon)  
Stanislas Champin (CH Valence)  
Yves Cottin (CHU Dijon)  
Martine Gilard (CHU Brest)  
Pierre Aubry (CH Gonesse)  
Marc Bedossa (CHU Rennes)  
Nicolas Delarche (CH Pau)  
Patrick Dupouy (Hôpital Privé Antony)

**Supplementary Table 1. Presenting characteristics.**

| <b>Presenting characteristics</b>   |                |
|-------------------------------------|----------------|
|                                     | <b>N=373</b>   |
| Clinical presentation               |                |
| - ACS                               | 359 (96.2)     |
| STEMI                               | 170 (45.6)     |
| NSTEMI                              | 189 (50.7)     |
| - Unstable angina                   | 1 (0.3)        |
| - Other                             | 13 (3.5)       |
| Initial cardiac arrest              | 21 (5.6)       |
| Trigger                             |                |
| - Emotional stress                  | 170 (45.6)     |
| - Physical stress                   | 46 (12.3)      |
| - Consumption of toxics             | 10 (2.7)       |
| Troponin elevation                  | 352 (94.4)     |
| Initial treatment                   |                |
| - Anticoagulant therapy             | 280/362 (77.3) |
| - Antiplatelet therapy              |                |
| Aspirin                             | 319/361 (88.3) |
| DAPT                                | 252/361 (69.8) |
| GP IIb/IIIa inhibitors              | 14/361 (4.4)   |
| - Fibrinolysis                      | 14 (3.9)       |
| - Vasopressive agent                | 5 (1.4)        |
| <b>Angiographic characteristics</b> |                |
| Single-vessel SCAD                  | 351 (94.1)     |
| Multivessel SCAD                    | 22 (5.9)       |
| LM involved                         | 8 (2.1)        |
| LAD involved                        | 221 (59.2)     |
| LCX involved                        | 113 (30.3)     |
| RCA involved                        | 63 (16.9)      |
| Angiographic signs                  |                |
| Absence of atheroma                 | 361 (96.8)     |
| Radiolucent flap                    | 61 (16.3)      |
| Radiocontrast agent stagnation      | 61 (16.3)      |
| Starting and ending on side branch  | 304 (81.5)     |
| Long and smooth narrowing           | 313 (83.9)     |
| Number of arteries involved         | 405            |
| Angiographic SCAD type              |                |
| Type 1                              | 59 (14.6)      |
| Type 2                              | 285 (70.4)     |

|                              |                  |
|------------------------------|------------------|
| Type 3                       | 35 (8.6)         |
| Mixed type                   | 26 (6.4)         |
| TIMI flow                    | N=405            |
| 0                            | 77 (19.0)        |
| 1                            | 27 (6.7)         |
| 2                            | 52 (12.8)        |
| 3                            | 249 (61.5)       |
| QCA analysis, median (Q1-Q3) | N=405            |
| Lesion length, mm            | 40 (25-50)       |
| Diameter stenosis, %         | 90.3 (77.2-96.7) |
| Reference diameter, mm       | 2.6 (2.2-3.0)    |
|                              |                  |

Details are shown as mean, n (%).

ACS: acute coronary syndrome; DAPT: dual antiplatelet therapy; LAD: left anterior descending artery; LCX: left circumflex artery; LM: left main; NSTEMI: non-ST-segment elevation myocardial infarction; QCA: quantitative coronary angiography; RCA: right coronary artery; SCAD: spontaneous coronary artery dissection; STEMI: ST-segment elevation myocardial infarction

**Supplementary Table 2. Follow-up and MACE rate in Conservative group versus PCI group.**

|                                     | <b>Conservative<br/>N=314</b> | <b>PCI<br/>N=58</b> | <b><i>p</i>-value</b> |
|-------------------------------------|-------------------------------|---------------------|-----------------------|
| CPK peak, UI/l                      | 325 [148-690]                 | 986 [376-1,365]     | <i>p</i> <0.01        |
| Left ventricle ejection fraction, % | 60 [59-65]                    | 60 [50-62]          | <i>p</i> =ns          |
| Length of hospital stay, days       | 5 [3-8]                       | 6 [4-9]             | <i>p</i> =0.21        |
| SCAD recurrence, %                  | 8 (2.5)                       | 4 (6.9)             | <i>p</i> =0.08        |
| MACE, %                             | 32 (10.2)                     | 13 (22.4)           | <i>p</i> <0.01        |

**Supplementary Table 3. Association analysis between rs9349379 (PHACTR1) and SCAD stratified according to the presence of fibromuscular dysplasia in the DISCO study.**

| <b>Case control study</b> | <b>n</b> | <b>GG</b> | <b>GA</b> | <b>AA</b> | <b>EAF</b> | <b>OR</b> | <b>(95% CI)</b> | <b><i>p</i>-value</b> |
|---------------------------|----------|-----------|-----------|-----------|------------|-----------|-----------------|-----------------------|
| All SCAD patients         | 313      | 21        | 128       | 164       | 0.73       | 1.66      | (1.38-1.99)     | $7.08 \times 10^{-8}$ |
| SCAD with FMD             | 140      | 7         | 53        | 80        | 0.76       | 1.96      | (1.49-2.61)     | $2.31 \times 10^{-6}$ |
| SCAD without FMD          | 152      | 11        | 63        | 78        | 0.72       | 1.59      | (1.24-2.06)     | $3.79 \times 10^{-4}$ |
| Controls (PPS3)           | 3,468    | 505       | 1,636     | 1,327     | 0.62       |           |                 |                       |

The rs9349379-A (adenine) allele showed a higher prevalence among SCAD patients and its frequency was estimated to be 0.73 compared to a frequency of 0.62 in the controls and was significantly associated with increased risk for SCAD.

A: adenine; EAF: effect allele frequency; FMD: fibromuscular dysplasia; G: guanine; OR: odds ratio
